# Supplementary material
Source: ML conference proceedings conference paper supplement (https://openreview.net/forum?id=ONE9LYBQYS)

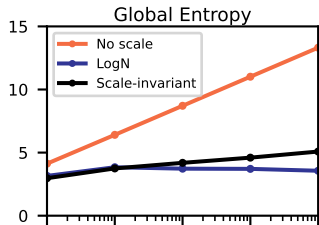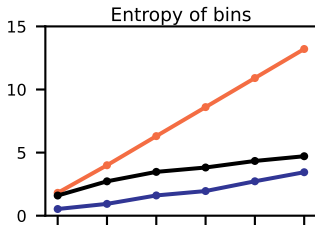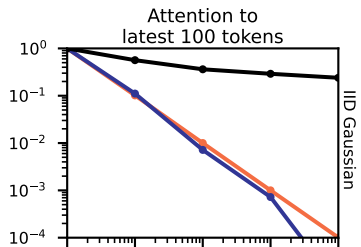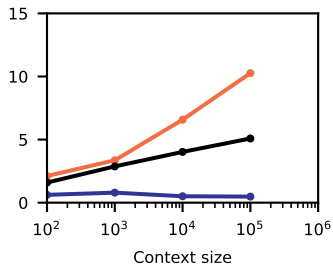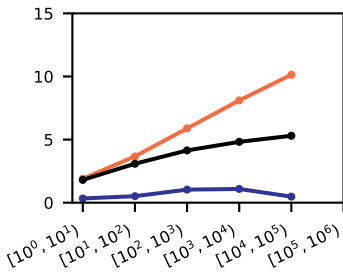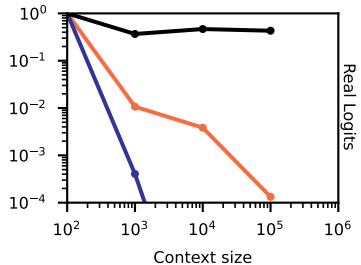

Supplement: supplementary_material [file entropy.pdf › scale_invariant_attention/figure1/entropy.pdf]

Expected entropy

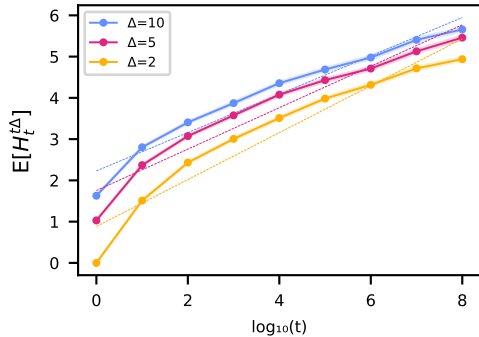

Square expected entropy

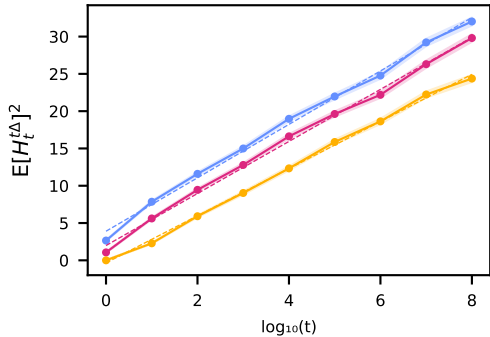

Supplement: supplementary_material [file plot.pdf › scale_invariant_attention/figure2_6/plot.pdf]

Expected entropy

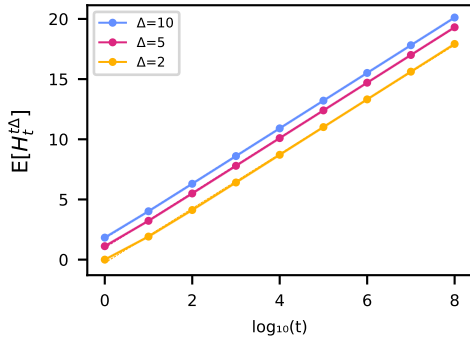

Square expected entropy

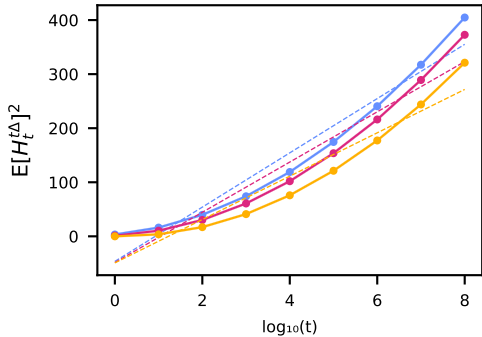

Supplement: supplementary_material [file plot_std.pdf › scale_invariant_attention/figure2_6/plot_std.pdf]

Train @4k / Val @4k

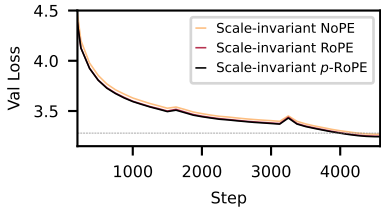

Train @4k / Val @16k

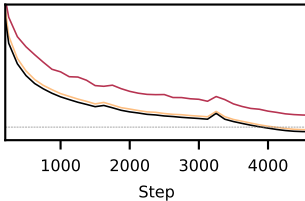

Train @4k / Val @64k

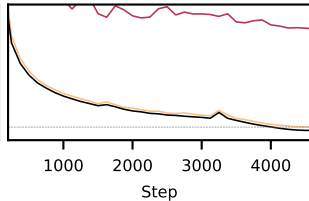

Supplement: supplementary_material [file val_loss_4k_sfa_comparison.pdf › scale_invariant_attention/figure3_7_8/val_loss_4k_sfa_comparison.pdf]

Train @4k / Val @16k

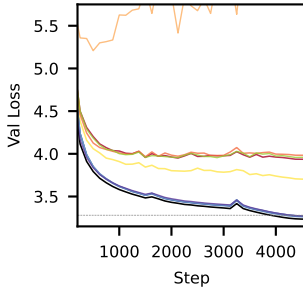

Train @4k / Val @64k

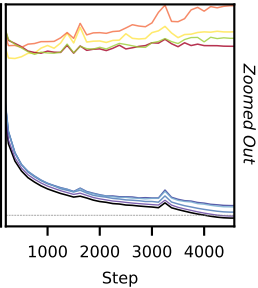

Train @4k / Val @16k Train @4k / Val @64k

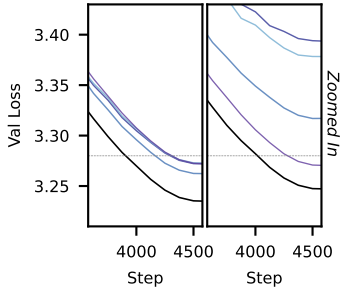

Supplement: supplementary_material [file val_loss_4k_with_zoom.pdf › scale_invariant_attention/figure3_7_8/val_loss_4k_with_zoom.pdf]

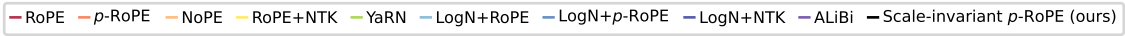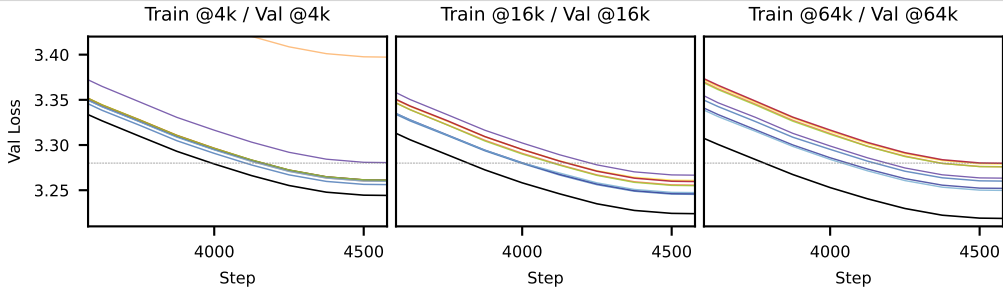

Supplement: supplementary_material [file val_loss_sfp_only_better.pdf › scale_invariant_attention/figure3_7_8/val_loss_sfp_only_better.pdf]

Train @4k / Val @4k

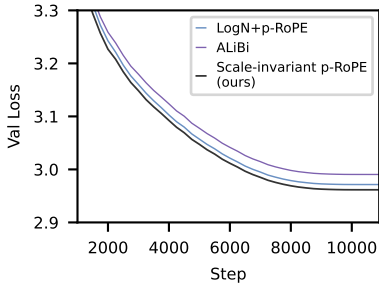

Train @4k / Val @16k

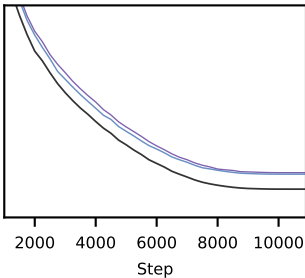

Train @4k / Val @64k

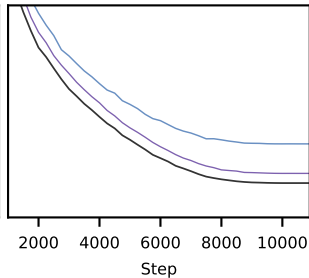

Supplement: supplementary_material [file val_loss_med_train_4k.pdf › scale_invariant_attention/figure4/val_loss_med_train_4k.pdf]

Train @4k / Val @4k

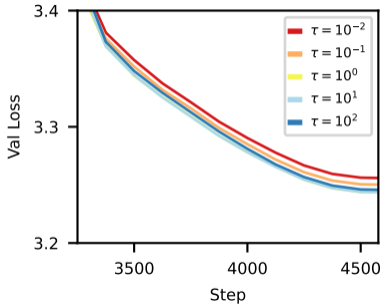

Train @4k / Val @16k

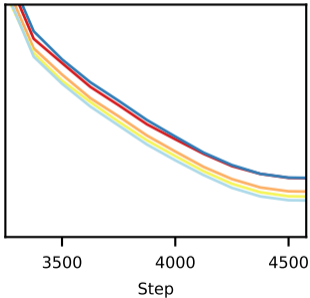

Train @4k / Val @64k

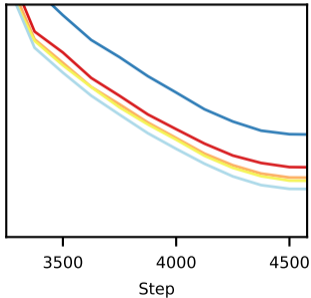

Supplement: supplementary_material [file sfa_tau_4k.pdf › scale_invariant_attention/figure5/sfa_tau_4k.pdf]
